# Supplementary material for: Periodical structural conversion and its mechanism in hematite: from nanospindles, to nanotubes, to nanotires
Source: Royal Society of Chemistry journal article supplement (doi:10.1039/c1ra00595b), 2011-12-02
Supplement: c1ra00595b.pdf [file c1ra00595b.pdf]

## Supporting information

### Periodically Structural Conversion and its Mechanism of Hematite from Nanospindles, to Nanotubes, to Nanotires

Chunting Liu<sup>1†</sup>, Ji Ma<sup>1</sup>, Houyang Chen<sup>2†</sup>

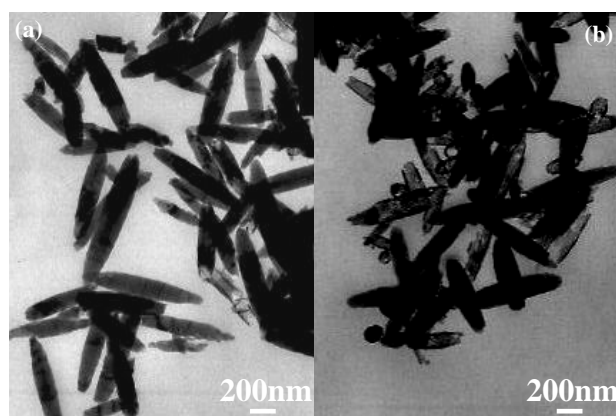

*Figure S1.* TEM images of the products prepared at 220 °C for (a) 12h, (b) 24h.
